# Supplementary material for: Constraint and divergence of global gene expression in the mammalian embryo
Source: eLife journal article supplement (doi:10.7554/elife.05538), 2015-04-14

**Figure 4 – figure supplement 1.** qq plots from random forest model that simultaneously considers age (number of somites) and genotype. Left, all gene-marker pairs; right, gene-marker pairs only in trans.

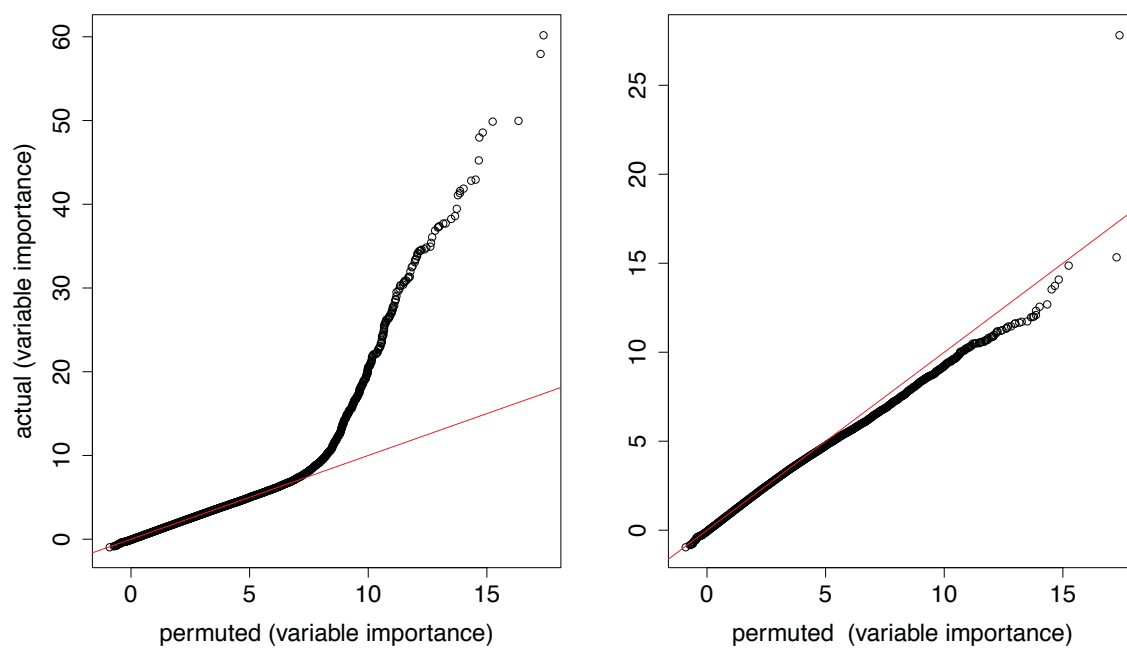

Supplement: supp [file elife-05538-supp-v1.zip]
