# Supplementary material for: Constraint and divergence of global gene expression in the mammalian embryo
Source: eLife journal article supplement (doi:10.7554/elife.05538), 2015-04-14

**Figure 2 – figure supplement 2.** ASE time courses for top 8 genes exhibiting significant dependence of ASE on somite number. Left panel, BAF; right panel, normalized expression. Only heterozygous embryos are shown in the left panels.

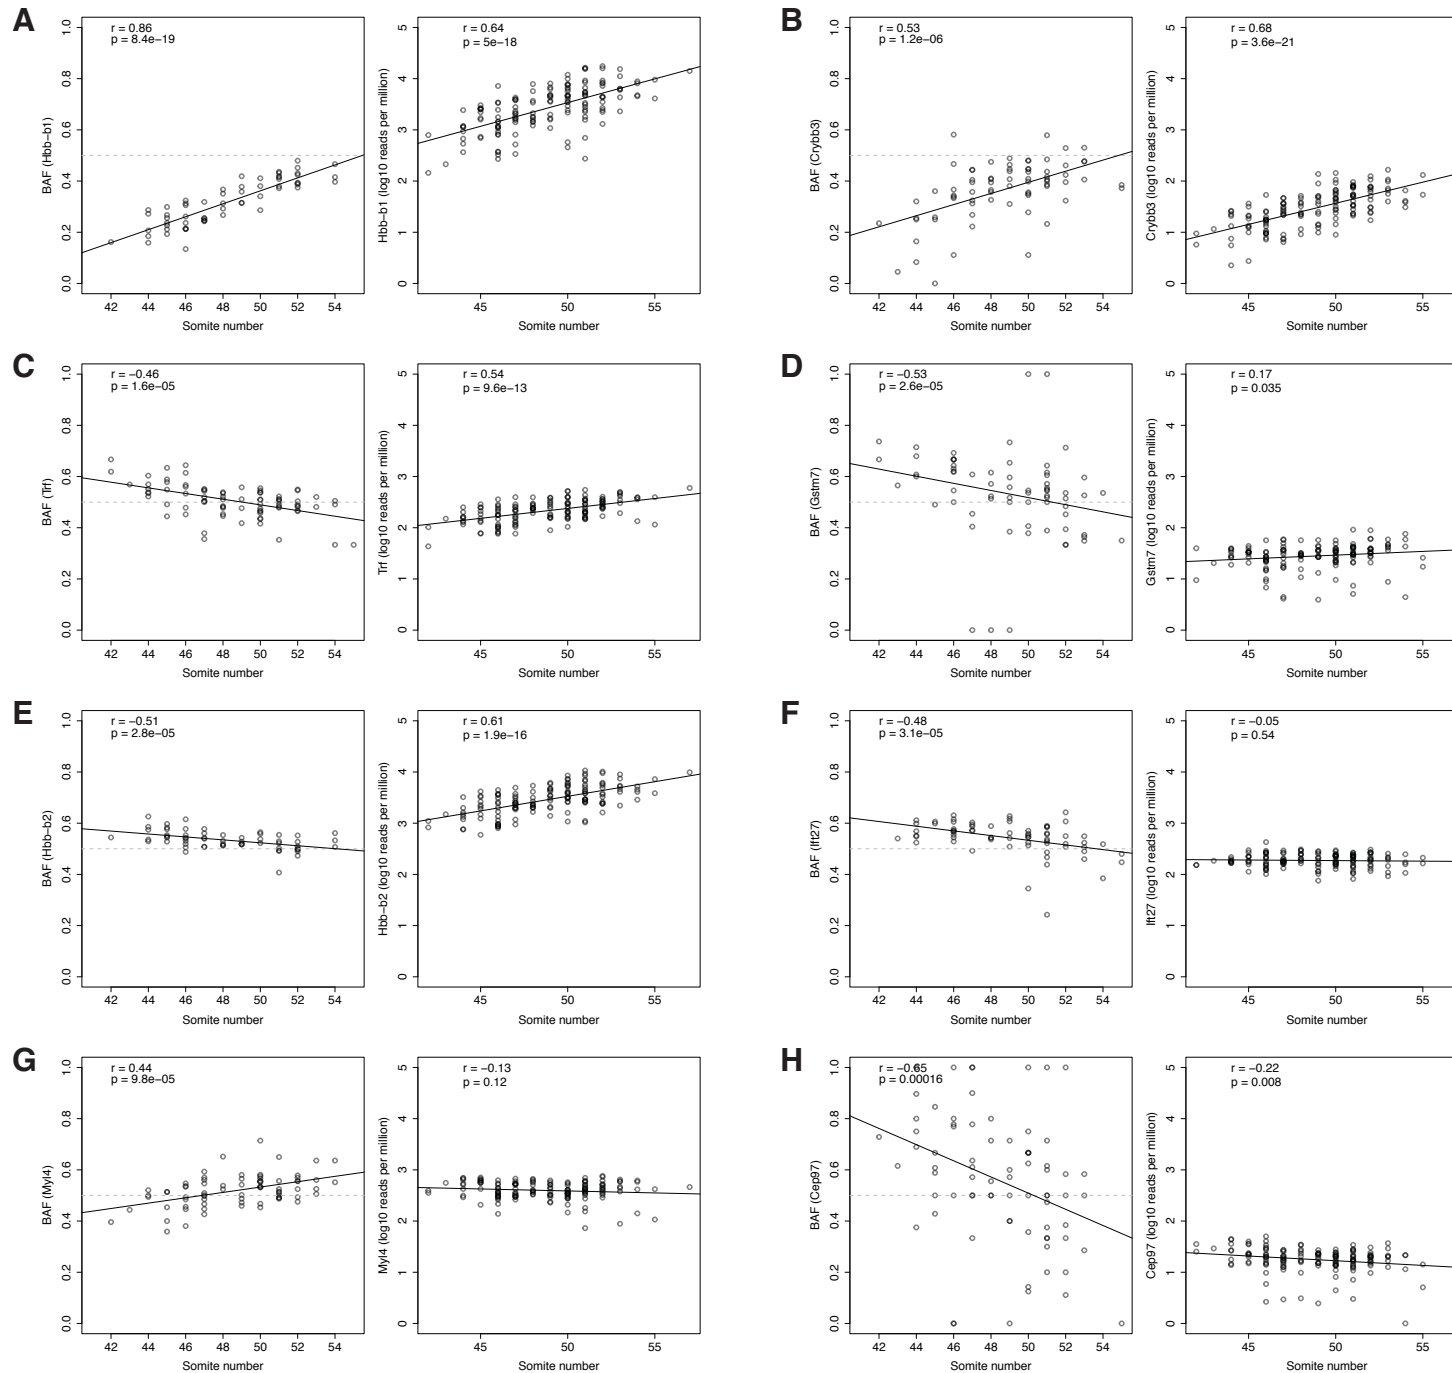

Supplement: supp [file elife-05538-supp-v1.zip]
