# Supplementary figures and images for: Constraint and divergence of global gene expression in the mammalian embryo
Source: eLife journal article supplement (doi:10.7554/elife.05538), 2015-04-14

**Figure 2 – figure supplement 1.** Histogram of BAF across genes with SNP coverage, in 0.01 increments.

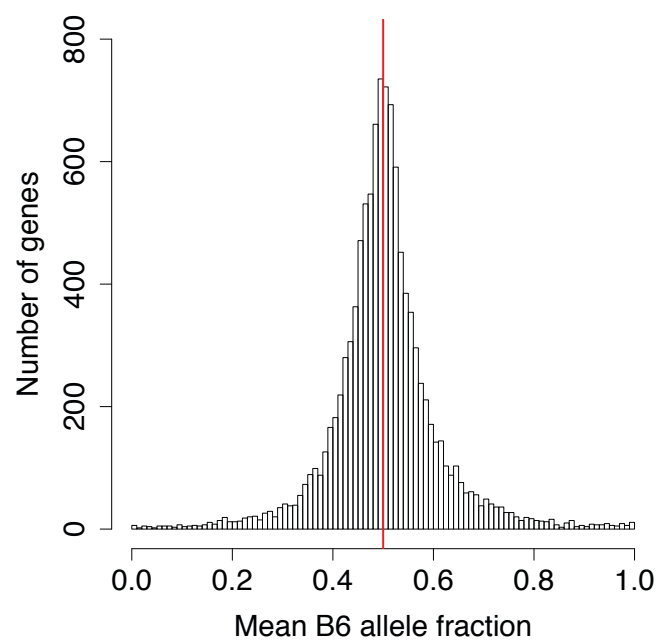

Supplement: supp [file elife-05538-supp-v1.zip]
